# Supplementary material for: CRISPR/Cas9-Mediated Knockout of tnfaip1 in Zebrafish Plays a Role in Early Development
Source: MDPI journal article supplement (doi:10.3390/genes14051005), 2023-04-28
Supplement: s1 [file s1]

## Supplementary Materials

**Table S1.** *In situ* hybridization primer sequences

| Name                   | Sequence (5'-3')                                |
|------------------------|-------------------------------------------------|
| <i>tnfaip1</i> probe F | TCTGCTGCACATCCATCGTT                            |
| <i>tnfaip1</i> probe R | <b>TAATACGACTCACTATAGGGTCACGCAAAGTTCAAGCAGC</b> |
| <i>neurod1</i> probe F | GGTGGGAATAGGCGTGAC                              |
| <i>neurod1</i> probe R | <b>TAATACGACTCACTATAGGGACCCGAATAGTTTGAGCAG</b>  |
| <i>tuba1b</i> probe F  | ATGCTGCTAATAACTATGCTCGTG                        |
| <i>tuba1b</i> probe R  | <b>TAATACGACTCACTATAGGGCCAACCTCCTCATAATCTTT</b> |
| <i>ccnd1</i> probe F   | CAACTTCATCGCAAGCCCTC                            |
| <i>ccnd1</i> probe R   | <b>TAATACGACTCACTATAGGGCGGTCATCAAAGCCACA</b>    |

**Table S2.** *tnfaip1* sgRNA sequence and genotyping primer sequence

| Name                        | Sequence (5'-3')                                                                      |
|-----------------------------|---------------------------------------------------------------------------------------|
| <i>tnfaip1</i> sgRNA1       | AATTAATACGACTCACTATAACCAGCTTCAGCCACACACCGTTTTAG<br>AGCTAGAAATAGC                      |
| <i>tnfaip1</i> sgRNA2       | AATTAATACGACTCACTATACGCTGAACATGGATCTCAGCGTTTTAG<br>AGCTAGAAATAGC                      |
| sgRNA scaffold              | GATCCGCACCGACTCGGTGCCACTTTTTCAAGTTGATAACGGACTAG<br>CCTTATTTTAACTTGCTATTTCTAGCTCTAAAAC |
| <i>tnfaip1</i> genotyping F | GGGAAATCAGACCCATCGTGT                                                                 |
| <i>tnfaip1</i> genotyping R | AGGTTGCATCTTCTCTCAGGG                                                                 |

**Table S3.** qPCR primer sequences

| Name                   | Sequence (5'-3')          |
|------------------------|---------------------------|
| <i>tnfaip1</i> qPCR F  | GGTCTGATAGAACTGTTTATGCGTT |
| <i>tnfaip1</i> qPCR R  | GGCTGATCGTGATGCCAAAC      |
| <i>hsipa13</i> qPCR F  | ACTCAATAAACAGGGCGGCA      |
| <i>hsipa13</i> qPCR R  | CATATTGCTGCCGAACCTCGC     |
| <i>dhx40</i> qPCR F    | AGAAGTGGGCTACCAAGTGC      |
| <i>dhx40</i> qPCR R    | AGCTGGGGTCTGCAAGAATC      |
| <i>nppa</i> qPCR F     | ATGGCCGGGGGACTAATTCT      |
| <i>nppa</i> qPCR R     | ATGCCTCTTCTGTTGCCAGG      |
| <i>tnfrsf19</i> qPCR F | GAGAGTGCTGGAGTTGTCCC      |
| <i>tnfrsf19</i> qPCR R | CAGCCTGCCATTGTCAGAGA      |
| <i>clul1</i> qPCR F    | CTTTGGCAGACGTGTGTTGG      |
| <i>clul1</i> qPCR R    | GACTCCCTGGCAGACTTCAC      |
| <i>lrp2b</i> qPCR F    | CGGATGGCTCACGCTATTCT      |
| <i>lrp2b</i> qPCR R    | GACGTAACTTGGGGCTCACA      |
| <i>cryba1a</i> qPCR F  | GCGCTTGCAGCTTTTTGTTG      |
| <i>cryba1a</i> qPCR R  | GCACGTTATCCATGCCACAC      |
| <i>zbtb47a</i> qPCR F  | CATGCGGACATGGCGAAAAA      |
| <i>zbtb47a</i> qPCR R  | CAGATCTGGCTGGAAGAGGC      |
| <i>hsipb9</i> qPCR F   | TGCAGAACCTGAGGAGTGAG      |
| <i>hsipb9</i> qPCR R   | GAGAAAAGCCTCGGGTGTCC      |
| <i>adgrg4a</i> qPCR F  | AGGACAGCGTACCCTGATTAC     |
| <i>adgrg4a</i> qPCR R  | GCCAAATGCAGGATCGGATT      |

ATGTCAGGAGAGAGCTGCCTGCACCAGCTTCAGCCAACACACCGGGCCCATC  
CTGCCAGTCTCTTCAGTGGGCTACCCCAAGACTAACACCTGCACCTACCGTG  
GTGTGACCGGAAATAAGTACGTTACGCTCAATGTTGGTGGAATCTGTACTA  
CTCCACACTGCAGGTGCTCACTAGACAGGACACCCTGCTGAGATCCATGTTC  
AGCGGCAAGATGGAGGTGCTCACAGATAAGGAAGGTTGGATCCTAAATAGAT  
CGCTGTGGGAAACACTTTGGCTCCATTCTCAGCT

**Figure S1.** Partial sequence of the *tnfaip1* mutant related to Figure 2. Orange bases are the start codon. Red bases are the stop codon. The green nucleotide sequence in the black dashed box are the deleted 160 bases.
